# Supplementary material for: The YTHDC1-m6A-GADD45B Axis Promotes Chondrogenesis of hPDLSCs via Suppressing Senescence Through p53/p21 Signalling Pathway
Source: Research Square preprint supplement (doi:10.21203/rs.3.rs-7858488/v1), 2025-11-03
Supplement: Supplementary file 1 [file 932ffcf31350ddd195d76ac3.docx]

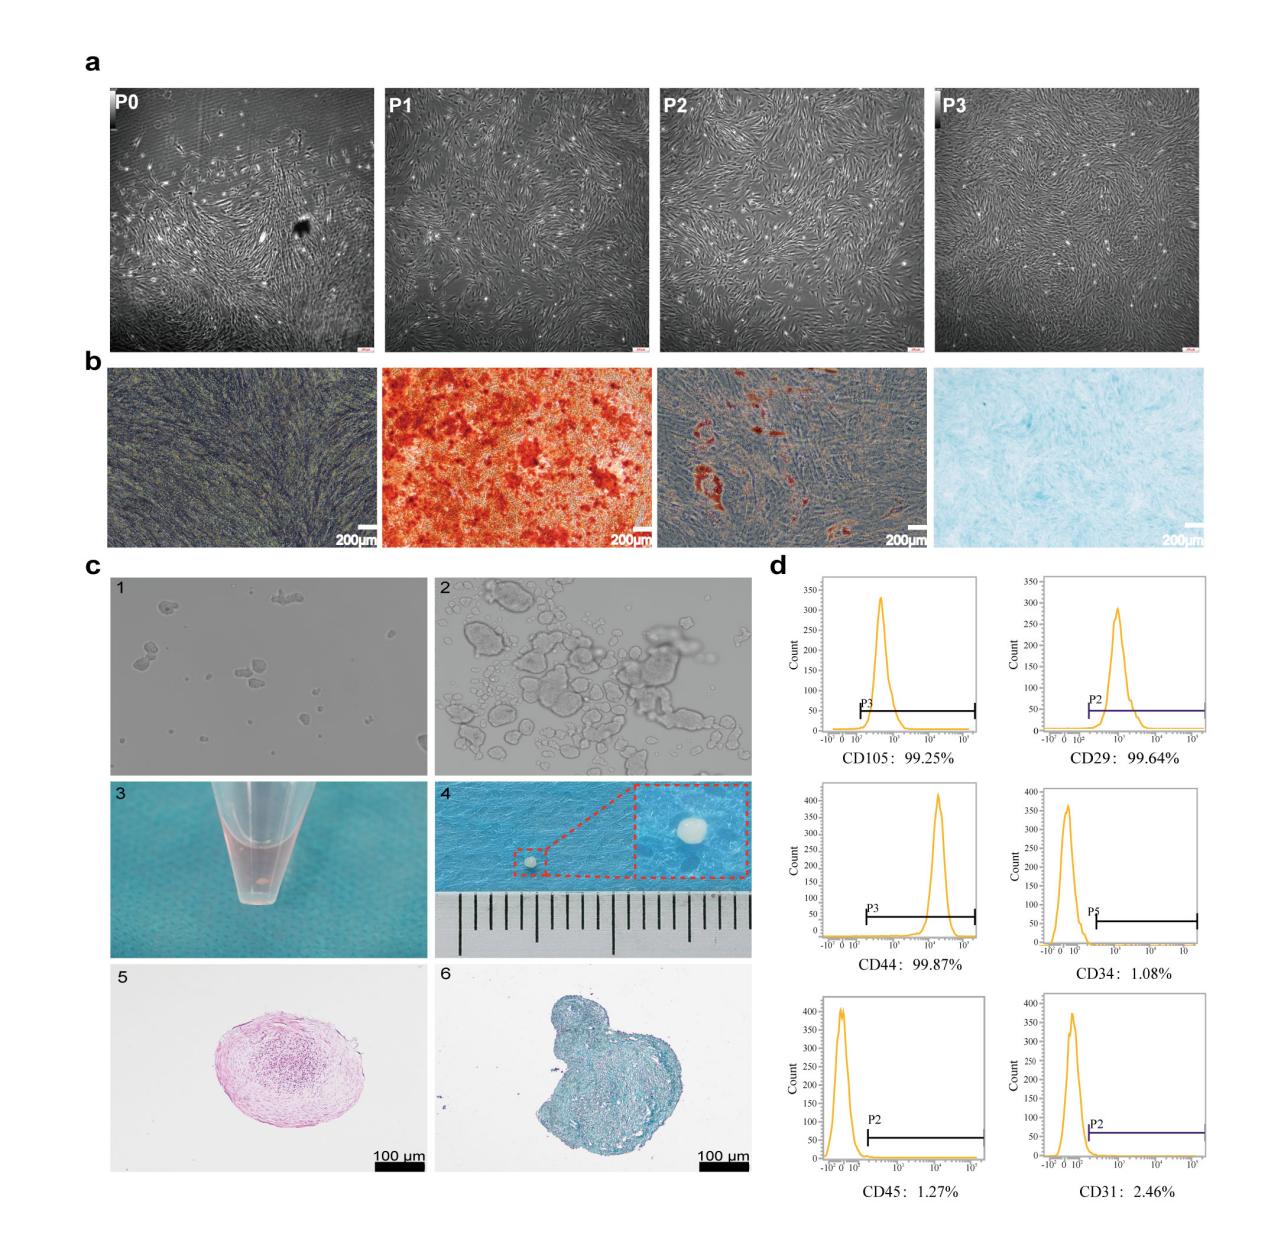


**FIGURE S1. Primary culture and 3D chondrogenic induction of hPDLSCs.**
**a** Primary culture and subculture of hPDLSCs, showing uniform long spindle-shaped morphology. (Scale bar = 200 µm). **b** Multidirectional differentiation potential of hPDLSCs: osteogenesis (Alizarin Red S and ALP staining), chondrogenesis (Alcian Blue staining), and adipogenesis (Oil Red O staining). (Scale bar = 200 µm). **c** 3D chondrogenic induction in a centrifuge tube system with Matrigel® as a natural extracellular matrix scaffold.(Scale bar = 100 µm) **d** Flow cytometric analysis of hPDLSCs surface marker expression: CD29, CD44, CD105, CD34, CD45, and CD31.

**Table 1 The oligonucleotide sequences**

| **Genes** | **Sequence 5’-3’** |
| --- | --- |
| siRNA-YTHDC1-NC-F | UUCUCCGAACGUGUCACGUTT |
| siRNA-YTHDC1-NC-R | ACGUGACACGUUCGGAGAATT |
| siRNA-YTHDC1-1-F | GAAGCAAGAUACAGAGAUATT |
| siRNA-YTHDC1-1-R | UAUCUCUGUAUCUUGCUUCTT |
| siRNA-YTHDC1-2-F | GGAAGAUGAAGAAGUAGAATT |
| siRNA-YTHDC1-2-R | UUCUACUUCUUCAUCUUCCTT |
| siRNAYTHDC1-3-F | GCAAGGAGUGUUAUCUUAATT |
| siRNAYTHDC1-3-R | UUAAGAUAACACUCCUUGCTT |

**Table 2 Details of constructs and viral vectors used in this study**

| **Vector type** | **Control Type** | **Construct/Virus Name** |
| --- | --- | --- |
| Lentivirus | OE NC | pcSLenti-EF1-EGFP-P2A-Puro-CMV-MCS-3×Flag-WPRE |
| OE YTHDC1 | pcSLenti-EF1-EGFP-P2A-Puro-CMV-YTHDC1-3×Flag-WPRE |
| Plasmid | WT | psiCHECK-2-GADD45B-mRNA (1867bp) |
| Mut757 | psiCHECK-2-GADD45B-mRNA (1867bp, A757T) |
| Mut1086 | psiCHECK-2-GADD45B-mRNA (1867bp, A1086T) |
| Mut1110&1137 | psiCHECK-2-GADD45B-mRNA (1867bp, A1110T; A1137T) |
| Mut1193 | psiCHECK-2-GADD45B-mRNA(1867bp, A1193T) |
| Lentivirus | OE NC | pcSLenti-EF1-EGFP-P2A-Puro-CMV-MCS-3xFLAG-WPRE |
| OE WT | pcSLenti-EF1-EGFP-P2A-Puro-CMV-3xFLAG-GADD45B+3UTR-WPRE |
| OE MUT | pcSLenti-EF1-EGFP-P2A-Puro-CMV-3xFLAG-GADD45B (Mut1193)+3UTR-WPRE |

**Table 3 Primer sequences for qPCR**

| **Genes** | **Primer sequence 5’-3’** |
| --- | --- |
| GAPDH-F | GGAGCGAGATCCCTCCAAAAT |
| GAPDH-R | GGCTGTTGTCATACTTCTCATGG |
| YTHDC1-F | AACTGGTTTCTAAGCCACTGAGC |
| YTHDC1-R | GGAGGCACTACTTGATAGACGA |
| SOX9-F | GGAAGTCGGTGAAGAACGGG |
| SOX9-R | CAAGGTCGAGTGAGCTGTGT |
| COL2A1-F | GCTCCTGCCGTTTCGCTG |
| COL2A1-R | TGAGGCAGTCTTTCACGTCT |
| CDKN2A/p16-F | GAAGGTCCCTCAGACATCC |
| CDKN2A/p16-R | GTAGGACCTTCGGTGACTG |
| CDKN1A/p21-F | TCTTGTACCCTTGTGCCTC |
| CDKN1A/p21-R | GGTAGAAATCTGTCATGCTGG |
| TP53/p53-F | CTCAGATAGCGATGGTCTGG |
| TP53/p53-R | CTGTCATCCAAATACTCCACAC |
| GADD45B-F | ATTGACGAGGAGGAGGAGGATGAC |
| GADD45B-R | CCGACACCCGCACGATGTTG |

**Table 4 Antibodies applied in this paper**

| **Antibodies** | **Company** | **Application** | **Dilution fold** | **Catalog Number** |
| --- | --- | --- | --- | --- |
| m6A antibody | Synaptic System | Dot blot | 1:1000 | 202-003 |
| YTHDC1 | Abcam | WB; IF; IHC | WB(1:1000); IF(1:200); IHC(1:500) | ab122340 |
| SOX9 | Abcam | WB; IF; IHC | WB(1:1000); IF(1:200); IHC(1:200) | ab196450 |
| COL2A1 | Abcam | WB; IF; IHC | WB(1:1000); IF(1:200); IHC(1:200) | ab307674 |
| p21 | Abcam | WB | 1:1000 | ab188224 |
| p16 | Abcam | WB; IF | WB：1:1000；IF：1：200 | ab51243 |
| p53 | Abcam | WB | 1:1000 | ab26 |
| GAPDH | Proteintech | WB | 1:10000 | 60004-1-ig‌ |

**Table 5 Primer sequences for MeRIP-qPCR**

| **Genes** | **Primer sequence 5’-3’** |
| --- | --- |
| Site 757-F | ACCAGTGGGTCCCCTACATC |
| Site 757-R | GTTTGTGGCAGCAACTCAACA |
| Site 1086-F | GAAGCTGAGGCCTTGGGATG |
| Site 1086-R | TCAGTCTCACTCCACCCCC |
| Site 1110&1137-F | ACCCTCCTTGAGACTGGAGC |
| Site 1110&1137-R | GTGCAGACAAGGACCAACCA |
| Site 1193-F | CCACACTTTGGGACTTGGGA |
| Site 1193-R | CCATCTCGCTCTCAGTGGTT |
